# Supplementary material for: Al filament-induced unipolar resistive switching in sputtered Al-rich AlN memristors with low operating voltage and high memory window
Source: Royal Society of Chemistry journal article supplement (doi:10.1039/d5ra05691h), 2025-01-01
Supplement: d5ra05691h1.pdf [file d5ra05691h1.pdf]

## ***Support Information***

### **Al filament-induced unipolar resistive switching in sputtered Al-rich AlN memristors with low operating voltage and high memory window**

Ankang Xiao<sup>1</sup>, Luyu Zhao<sup>1</sup>, Ying Yang<sup>1</sup>, Cai Jin<sup>1</sup>, Xiaoqin Yang<sup>1</sup>, Lili Ma<sup>1</sup>, Feifei Tian<sup>2</sup>,  
Wei Hu<sup>3</sup>, Zengli Huang<sup>1</sup> and Hong Gu<sup>1, a)</sup>

<sup>1</sup>Information Materials Research Department, Suzhou Laboratory, Suzhou 215123, China

<sup>2</sup>Testing and Analysis Platform, Suzhou Institute of Nano-technology and Nano-Bionics,  
Suzhou 215123, China

<sup>3</sup>Key Laboratory of Optoelectronic Technology and System of Ministry of Education,  
College of Optoelectronic Engineering, Chongqing University, Chongqing 400044, China

<sup>a)</sup>Authors to whom correspondence should be addressed: guh@szlab.ac.cn

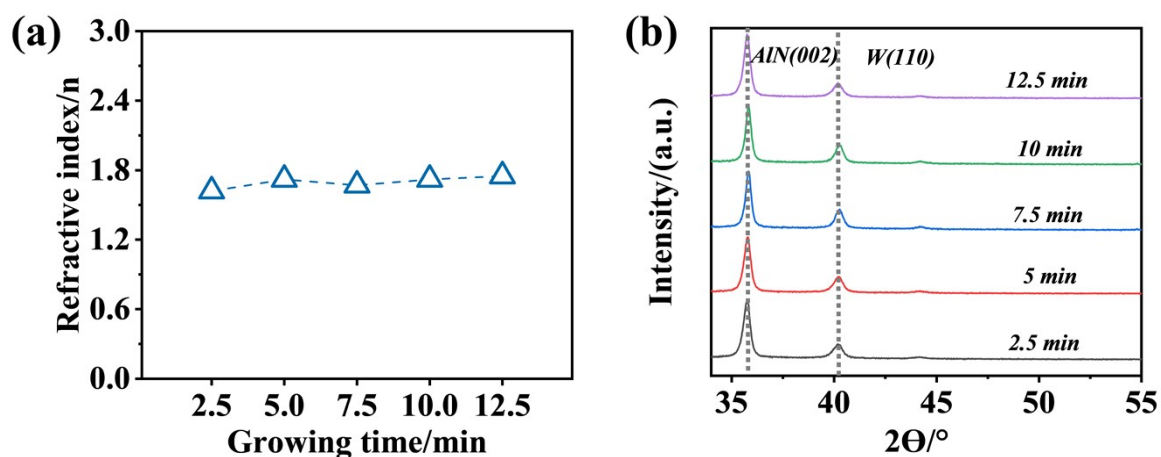

Figure 1. (a) Plot of Refractive index with growth time; (b) XRD patterns of AlN films.

Extending the growth time has a negligible variation on the refractive index as determined by spectroscopic ellipsometry, suggesting minimal impact on film quality (Figure 1 (a)). Additionally, the diffraction peaks near  $36^\circ$ , as depicted in the Figure 1 (b), exhibit excellent consistency, indicating a consistent (002) crystal orientation in the AlN films. The diffraction peak observed at approximately  $40^\circ$  corresponds to the (110) crystal orientation of W.

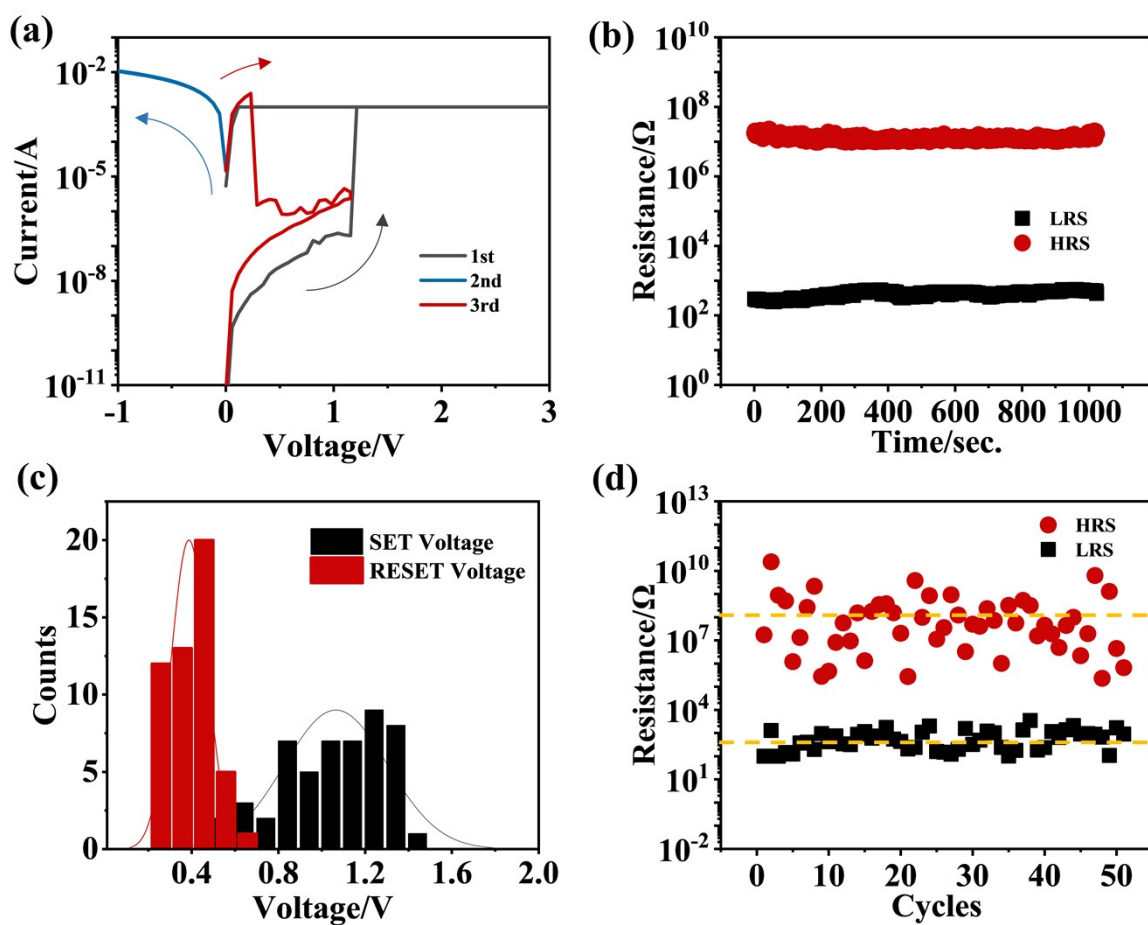

**Figure 2. I-V resistive switching curves at the positive and negative voltage, (b) retention, (c) the unipolar SET and RESET voltage distribution histograms and (d) endurance of Al/AlN/W devices prepared at N<sub>2</sub>/Ar ratio of 1:3.**

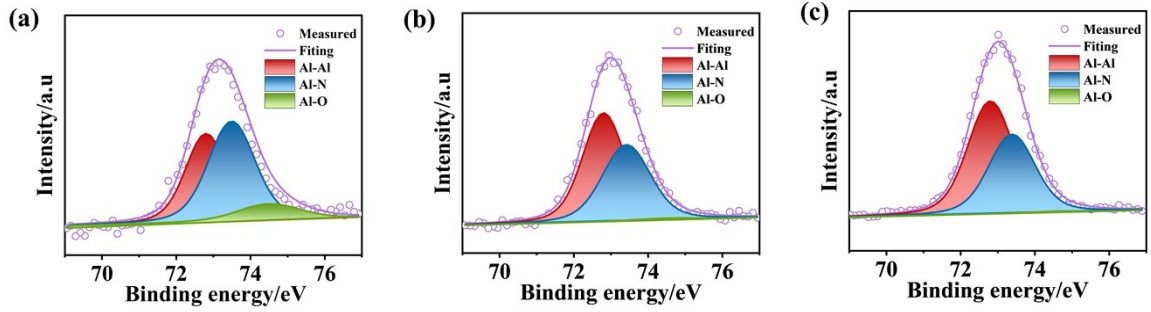

**Figure 3. XPS spectra of the AlN film prepared under N<sub>2</sub>/Ar ratio of (a) 2:1, (b) 1:1, (c) 1:2.**
